# Supplementary material
Source: Springer Nature journal article supplement (https://www.springermedizin.de/resource/supplementary/12984_2010_290_MOESM2_ESM.pdf/9605708)

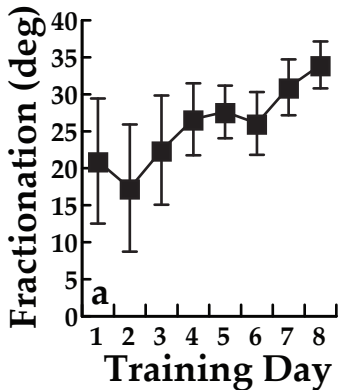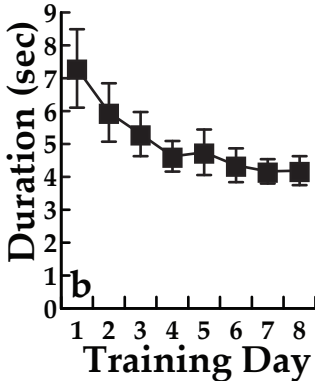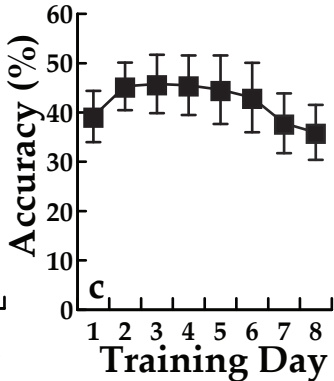

Supplement: MOESM2 [file 9605708]
